# Supplementary material for: How important is polyelectrolyte complex formation in biomimetic mineralisation? Manipulation via alcohol addition
Source: Royal Society of Chemistry journal article supplement (doi:10.1039/c3dt50299f), 2013-01-01
Supplement: c3dt50299f.pdf [file c3dt50299f.pdf]

## Electronic Supplementary Information:

### How important is polyelectrolyte complex formation in biomimetic mineralisation? Manipulation via alcohol addition

Natasha H. Munro, Kathryn M. McGrath\*

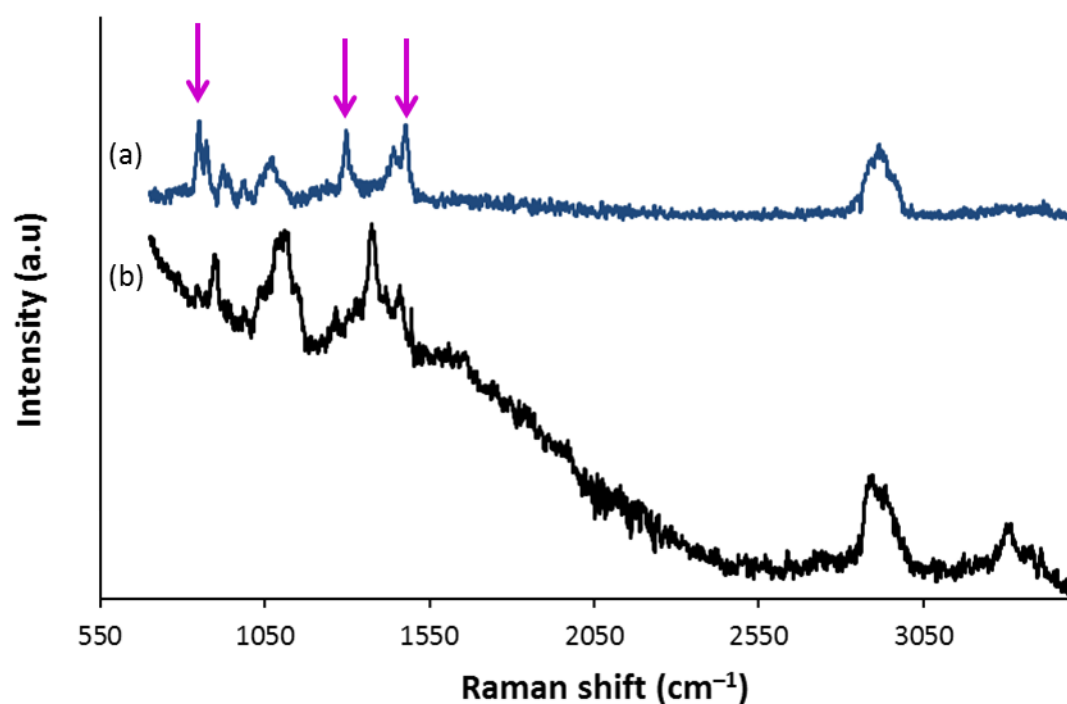

Figure S1 – Raman spectra of a chitosan film prepared with 20% 1,3-propanediol (a) oven-dried for 24 hours and (b) after base treatment and washing. The arrows indicate peaks due to the solvent 1,3-propanediol.

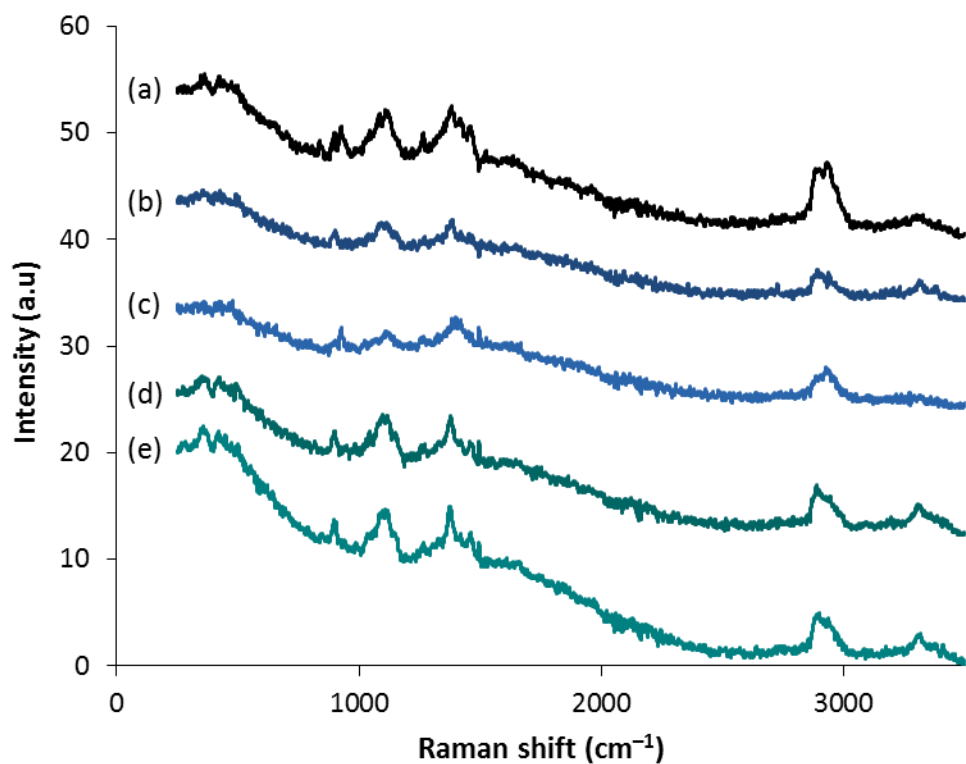

Figure S2 – Raman spectra of dried and based treated chitosan films prepared from chitosan solutions containing (a) no alcohol, (b) ethanol, (c) propanol, (d) 1,2 propandiol and (e) 1,3-propandiol.
